# Supplementary material for: Simulation Analysis and Online Monitoring of Suspension Frame of Maglev Train
Source: MDPI journal article supplement (doi:10.3390/machines11060607), 2023-06-02
Supplement: s1 [file s1]

Archive with 1 entries (1 files):
- machines-2415263-supplementary.pdf
